# Supplementary material for: Highly effective synthesis of biomass-derived furanic diethers over a sulfonated zirconium–carbon coordination catalyst in alcohol systems
Source: Royal Society of Chemistry journal article supplement (doi:10.1039/d3gc00479a), 2023-01-01
Supplement: d3gc00479a1.pdf [file d3gc00479a1.pdf]

## Electronic Supplementary Information

### Highly effective synthesis of biomass-derived furanic diethers over a sulfonated zirconium-carbon coordination catalyst in alcohol systems

Xinming Shen,<sup>‡a</sup> Jingyi Zheng,<sup>‡a</sup> Lei Hu,<sup>\*a</sup> Qinyin Gu,<sup>a</sup> Jiacheng Li,<sup>a</sup> Keru Chen,<sup>a</sup> Yetao

Jiang,<sup>a</sup> Xiaoyu Wang,<sup>a</sup> Zhen Wu<sup>a</sup> and Jinliang Song<sup>\*b</sup>

<sup>a</sup> Jiangsu Key Laboratory for Biomass-Based Energy and Enzyme Technology, Jiangsu Collaborative Innovation Center of Regional Modern Agriculture & Environmental Protection, School of Chemistry and Chemical Engineering, Huaiyin Normal University, Huaian 223300, China

<sup>b</sup> School of Chemical Engineering and Light Industry, Guangdong University of Technology, Guangzhou 510006, China

\* Corresponding Author: hulei@hytc.edu.cn; songjl\_2021@gdut.edu.cn.

‡ These authors contributed equally to this work.

## Experimental materials

5-Hydroxymethylfurfural (HMF, 98%), 5-methylfurfural (MF, 98%), 5-methylfurfuryl alcohol (MFA, 97%), 5-methoxymethylfurfural (MMF, 97%), 2,5-bis(hydroxymethyl)furan (BHMF, 98%), 2,5-bis(methoxymethyl)furan (BMMF, 97%), furfural (FF, 99%), furfuryl alcohol (FFA, 98%), benzaldehyde (BAL, 99%), benzyl alcohol (BAO, 99%), levulinic acid (LvA, 98%), methyl levulinate (ML, 99%), ethyl levulinate (EL, 98%), propyl levulinate (PL, 97%), butyl levulinate (BL, 98%) and  $\gamma$ -valerolactone (GVL, 98%) were purchased from Saen Chemical Technology Co., Ltd. (Shanghai, China). CT269DR, a macroporous sulfonated resin, was provided by Purolite Co., Ltd. (Huzhou, China). Zirconium tetrachloride ( $ZrCl_4$ , 99%) and p-toluenesulfonic acid (TsOH, 99%) were obtained from Shanghai Aladdin Reagent Co., Ltd. (Shanghai, China). Glucose, methanol (MeOH), ethanol (EtOH), n-propanol (nPrOH), isopropanol (iPrOH), n-butanol (nBuOH), sec-butanol (sBuOH), dimethylformamide (DMF) and other chemicals were supplied by Sinopharm Chemical Reagent Co., Ltd. (Shanghai, China) and used without any purification.

## Catalyst characterization

Fourier transform infrared (FT-IR) spectra were recorded on a Nicolet 380 spectrometer. X-ray diffraction (XRD) patterns were performed on a Bruker D8 Advance diffractometer with a Cu K $\alpha$  radiation source ( $\lambda=0.15418$  nm). Scanning electron microscopy (SEM), high-resolution transmission electron microscopy (HR-TEM) and high-angle annular dark-field scanning transmission electron microscopy (HAADF-STEM) images were carried out on a Zeiss Supra55 microscope, a JEM-2100f

microscope and a FEI Titan Themis G2 F30 microscope, respectively. Element contents were determined by a VISTA-MPX inductively coupled plasma atomic emission spectrometer (ICP-AES) and a Vario EL III elemental analyzer (EA), respectively. Nitrogen adsorption-desorption (NAD) isotherms were measured on a ASAP 2020 physisorption analyzer at 77 K. Temperature-programmed desorption (TPD) profiles, X-ray photoelectron spectroscopy (XPS) spectra and pyridine-adsorbed FT-IR spectra were collected on an AutoChem II 2920 chemisorption analyzer, an Escalab 250Xi spectrometer with an Al K $\alpha$  excitation source ( $h\nu = 1486.6$  eV) and a Bruker Tensor 27 spectrometer in the range of 1300 to 1700  $\text{cm}^{-1}$ , respectively.

### **2,5-Bis(alkoxymethyl)furans (BAMFs) synthesis**

Take the standard 2,5-bis(isopropoxymethyl)furan (BIPMF) as an example (Scheme S1), the detailed synthesis procedures were as follows: 1 g of BHMF, 0.25 g of CT269DR and 49 g of iPrOH were mixed and added into a 100 mL of stainless steel autoclave, which was sealed and heated to 50 °C under a stirring rate of 400 rpm. After 24 h, the autoclave was rapidly quenched to room temperature (RT). Note that BHMF conversion and BIPMF selectivity were greater than 99% (Fig. S1). Next, CT269DR was separated from the reaction mixture by filtration, and then, the filtrate was distilled to remove the low-boiling iPrOH and H<sub>2</sub>O at 60 °C for 1 h under the reduced pressure. Subsequently, the remnant was renewedly dissolved into 25 mL ethyl acetate (EtOAc), which was followed by adding 0.5 g of activated carbon (AC). After 10 min under vigorous agitation, the mixture was further filtered and distilled to obtain the pure BIPMF. Finally, the pure BIPMF was confirmed by nuclear magnetic resonance (NMR)

spectrometer (Bruker ADVANCE II) (Fig. S2). Moreover, other BAMFs, including 2,5-bis(ethoxymethyl)furan (BEMF), 2,5-bis(propoxymethyl)furan (BPMF), 2,5-bis(butoxymethyl)furan (BBMF) and 2,5-bis(sec-butoxymethyl)furan (BSBMF), were also synthesized by using the above method in the corresponding alcohols (Fig. S3-S6) and confirmed by NMR (Fig. S7-S10).

#### **5-(Isopropoxymethyl)furfural (IPMF) synthesis**

In order to synthesize the standard IPMF (Scheme S2), 1 g of HMF, 0.25 g of CT269DR and 49 g of iPrOH were mixed and added into a 100 mL of stainless steel autoclave, which was sealed and heated to 60 °C under a stirring rate of 400 rpm. After 24 h, the autoclave was rapidly quenched to RT. Note that HMF conversion and IPMF selectivity were greater than 98% (Fig. S11). Next, other procedures were the same to those of BIPMF. Finally, the pure IPMF was confirmed by NMR (Fig. S12).

#### **5-Methyl-2-(isopropoxymethyl)furan (MIPMF) synthesis**

For the standard MIPMF (Scheme S3), 1 g of MFA, 0.25 g of CT269DR and 49 g of iPrOH were mixed and added into a 100 mL of stainless steel autoclave, which was sealed and heated to 50 °C under a stirring rate of 400 rpm. After 20 h, the autoclave was rapidly quenched to RT. Note that MFA conversion and MIPMF selectivity were greater than 99% (Fig. S13). Next, other procedures were the same to those of BIPMF. Finally, the pure MIPMF was confirmed by NMR (Fig. S14).

#### **Isopropyl furfuryl ether (IPFE) synthesis**

For the standard IPFE (Scheme S4), 1 g of FFA, 0.25 g of CT269DR and 49 g of iPrOH were mixed and added into a 100 mL of stainless steel autoclave, which was

sealed and heated to 50 °C under a stirring rate of 400 rpm. After 20 h, the autoclave was rapidly quenched to RT. Note that FFA conversion and IPFE selectivity were greater than 98% (Fig. S15). Next, other procedures were the same to those of BIPMF. Finally, the pure IPFE was confirmed by NMR (Fig. S16).

### Product analysis

The liquid samples were analyzed by gas chromatograph (GC, Shimadzu GC-2014), which were equipped with a flame ionization detector (FID) and a SK-WAX capillary column (30 m × 0.32 mm × 0.25 μm). For analysis, the injector temperature and detector temperature were set to 300 °C. Meanwhile, the initial column temperature was set to 40 °C and maintained for 2 min, and then, the column temperature was increased to 100 °C with a heating rate of 5 °C/min and maintained for 2 min, after that, the column temperature was further increased to 250 °C with a heating rate of 10 °C/min and maintained for 1 min. Moreover, HMF, BHMF, IPMF, HIPMF, BIPMF and other BAMFs were based on the following equations:

$$\text{HMF conversion (\%)} = \left(1 - \frac{\text{Mole of HMF in products}}{\text{Initial mole of HMF}}\right) \times 100 \quad (1)$$

$$\text{BHMF yield (\%)} = \frac{\text{Mole of BHMF in products}}{\text{Initial mole of HMF}} \times 100 \quad (2)$$

$$\text{IPMF yield (\%)} = \frac{\text{Mole of IPMF in products}}{\text{Initial mole of HMF}} \times 100 \quad (3)$$

$$\text{HIPMF yield (\%)} = \frac{\text{Mole of HIPMF in products}}{\text{Initial mole of HMF}} \times 100 \quad (4)$$

$$\text{BIPMF yield (\%)} = \frac{\text{Mole of BIPMF in products}}{\text{Initial mole of HMF}} \times 100 \quad (5)$$

$$\text{BAMF yield (\%)} = \frac{\text{Mole of BAMF in products}}{\text{Initial mole of HMF}} \times 100 \quad (6)$$

## Catalyst recovery

To investigate the reusability of Zr-GC-SO<sub>3</sub>H-1.0, when each reaction cycle was completed, the catalyst was removed by centrifugation from the reaction mixture, and washed with EtOH and ultrapure water (UPW) for five times, respectively. After drying at 80 °C for 12 h in a vacuum oven, the recovered catalyst was directly used for the next reaction cycle under the same reaction conditions.

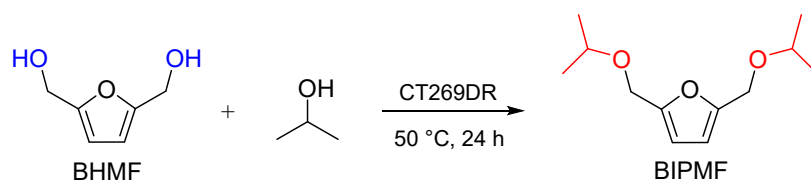

**Scheme S1** Synthesis of BIPMF over CT269DR in iPrOH.

Reaction conditions: 1 g BHMf, 0.25 g CT269DR, 49 g iPrOH, 50 °C, 24 h.

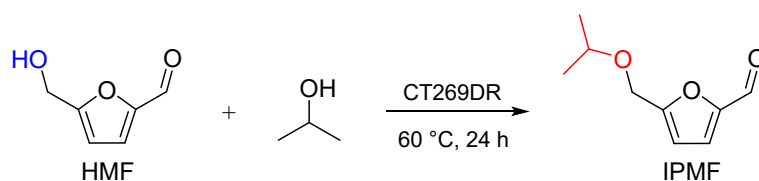

**Scheme S2** Synthesis of IPMF over CT269DR in iPrOH.

Reaction conditions: 1 g HMF, 0.25 g CT269DR, 49 g iPrOH, 60 °C, 24 h.

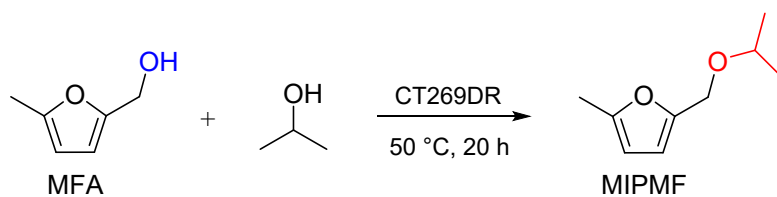

**Scheme S3** Synthesis of MIPMF over CT269DR in iPrOH.

Reaction conditions: 1 g MFA, 0.25 g CT269DR, 49 g iPrOH, 50 °C, 20 h.

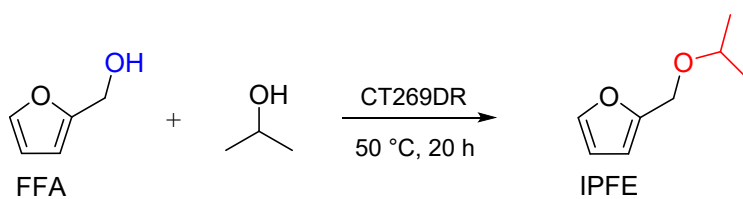

**Scheme S4** Synthesis of IPFE over CT269DR in iPrOH.

Reaction conditions: 1 g FFA, 0.25 g CT269DR, 49 g iPrOH, 50 °C, 20 h.

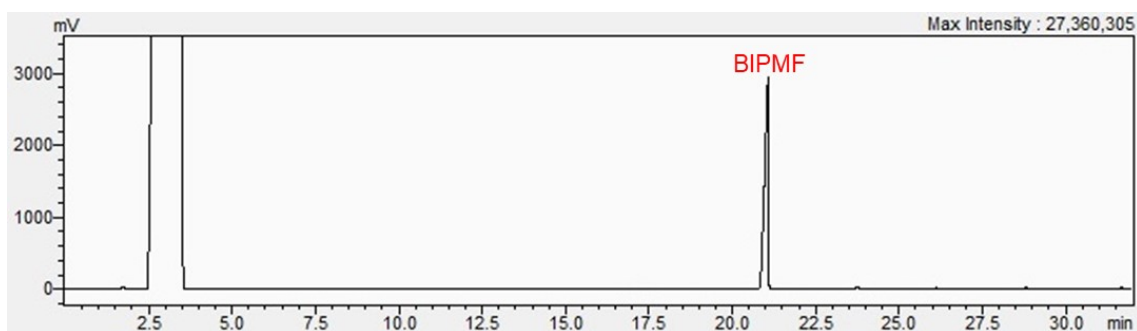

**Fig. S1** GC chromatogram for the etherification of BHMf to BIPMF over CT269DR.

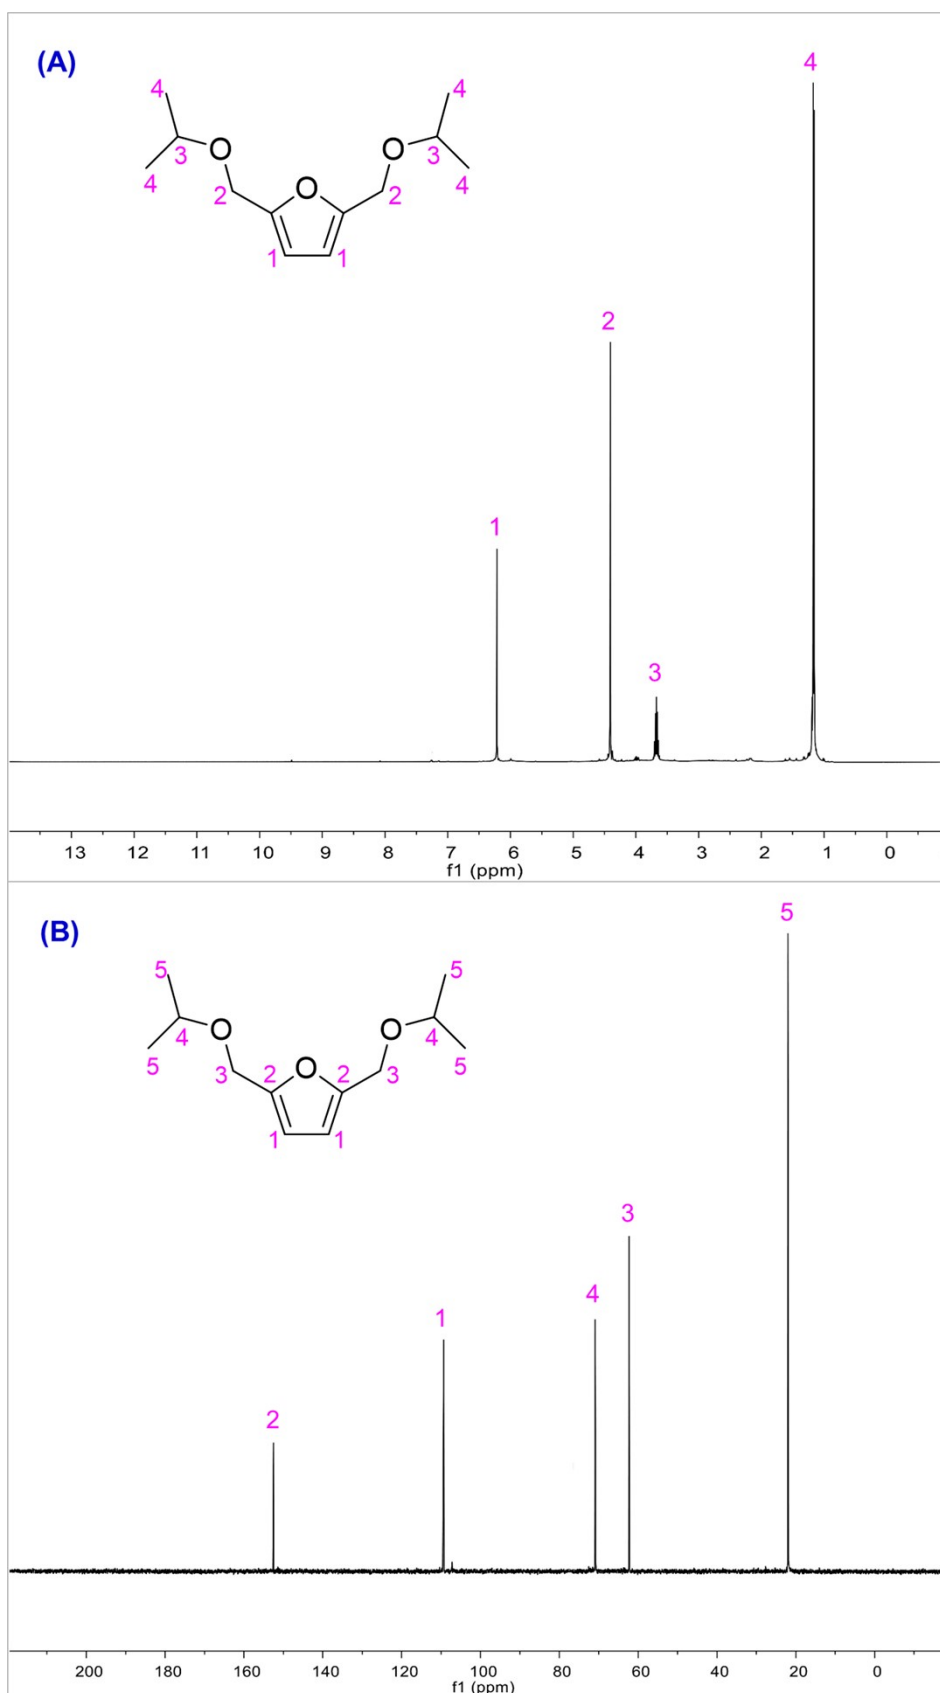



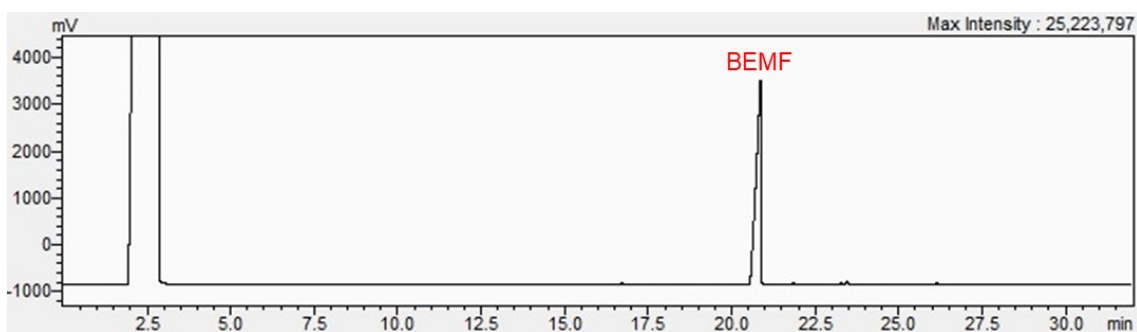

**Fig. S3** GC chromatogram for the etherification of BHMf to BEMf over CT269DR.

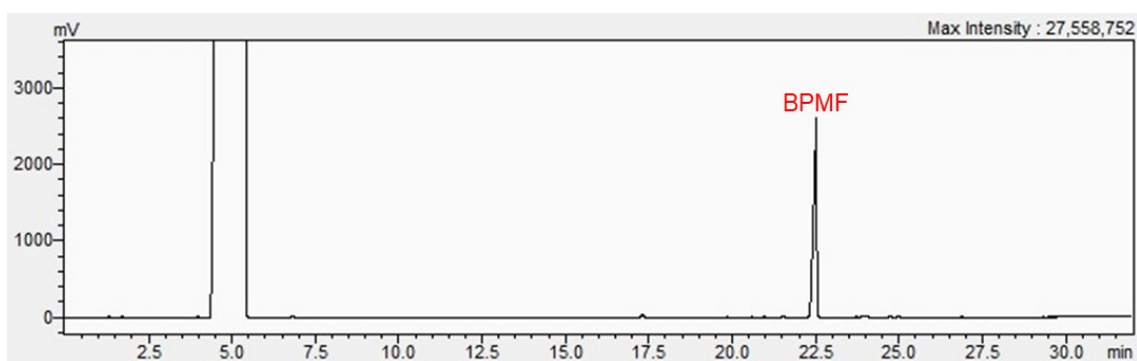

**Fig. S4** GC chromatogram for the etherification of BHMf to BPMf over CT269DR.

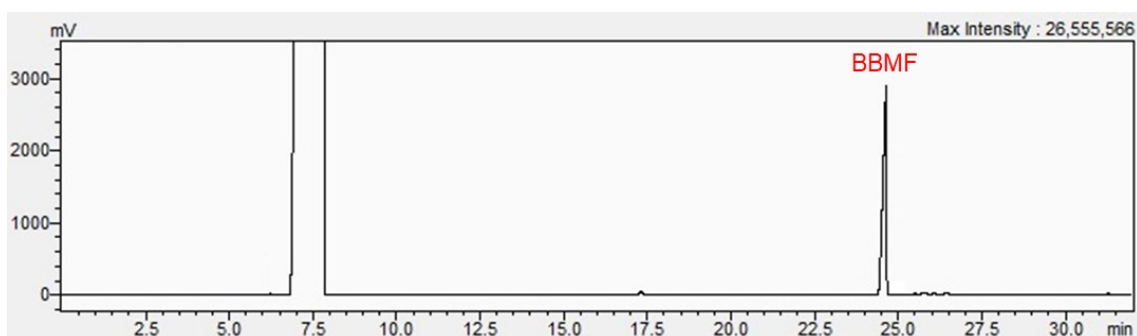

**Fig. S5** GC chromatogram for the etherification of BHMf to BBMf over CT269DR.

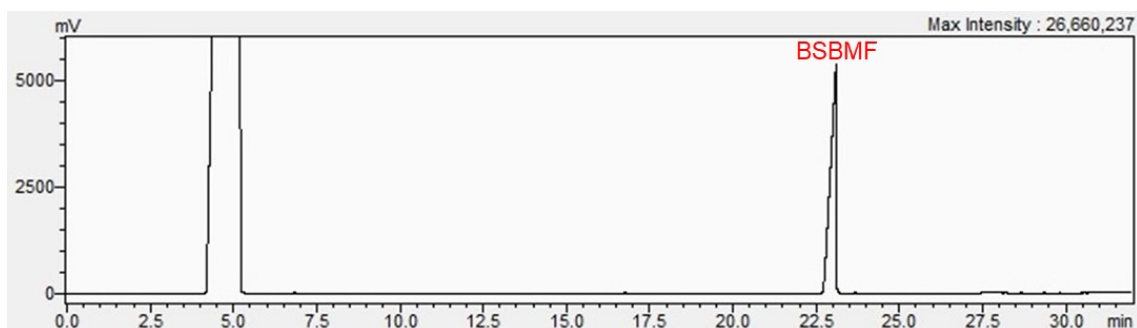

**Fig. S6** GC chromatogram for the etherification of BHMf to BSBMf over CT269DR.

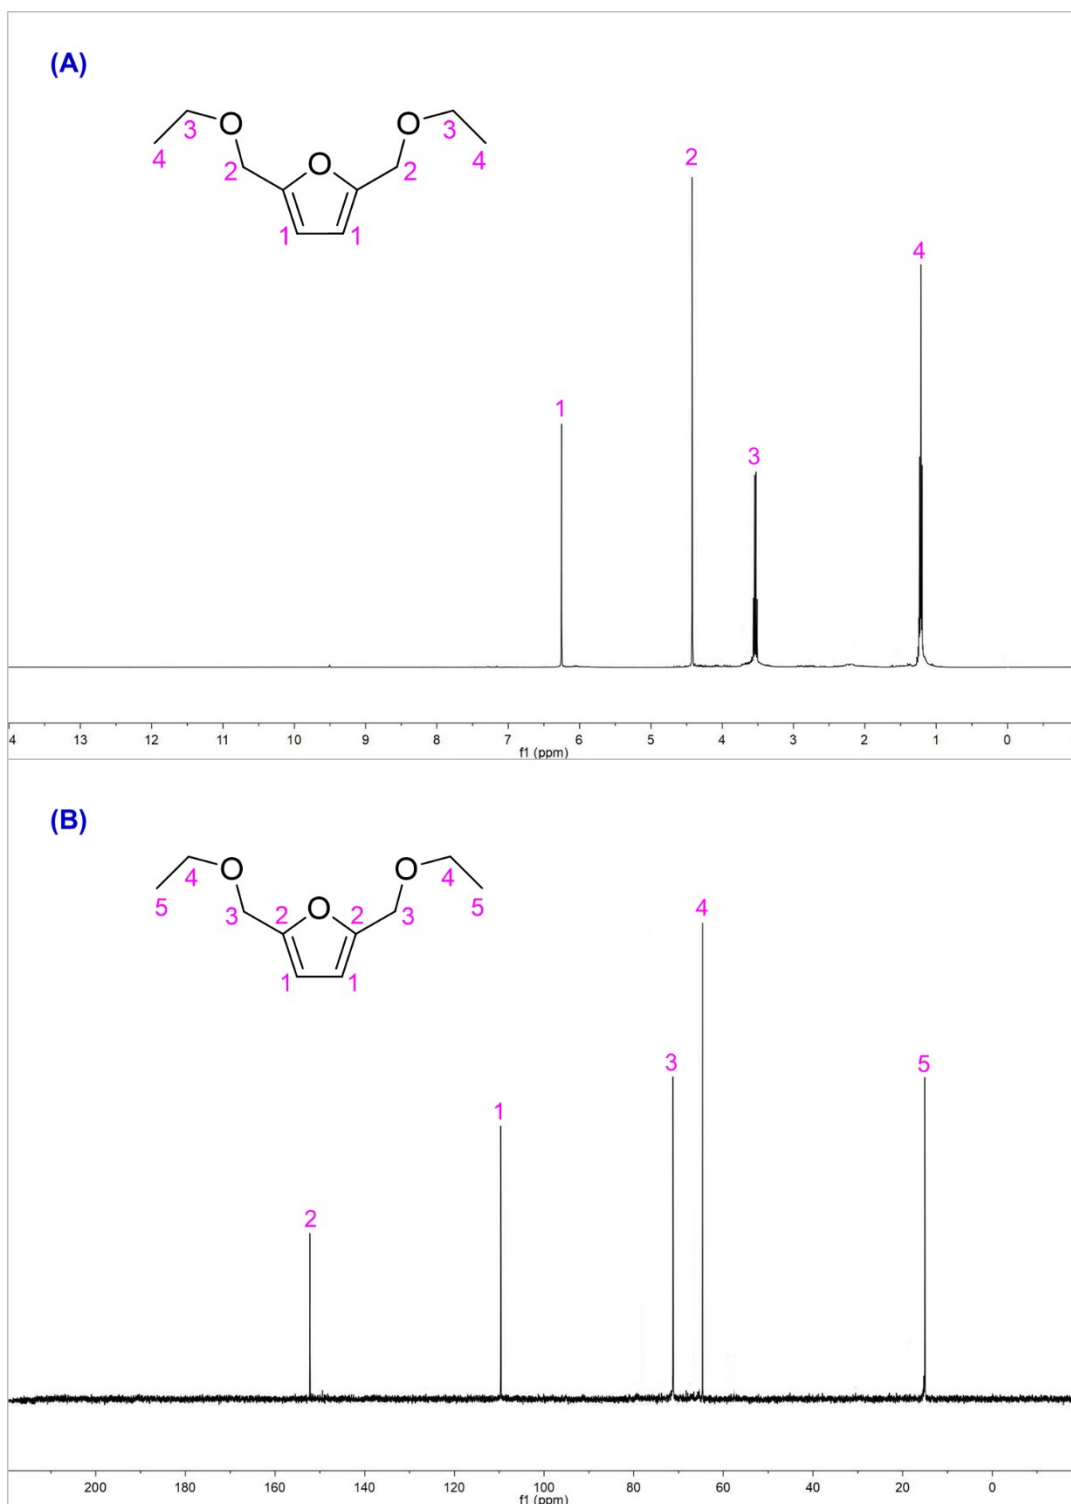

Fig. S7  $^1\text{H}$  NMR (A) and  $^{13}\text{C}$  NMR (B) of BEMF in  $\text{CDCl}_3$ .

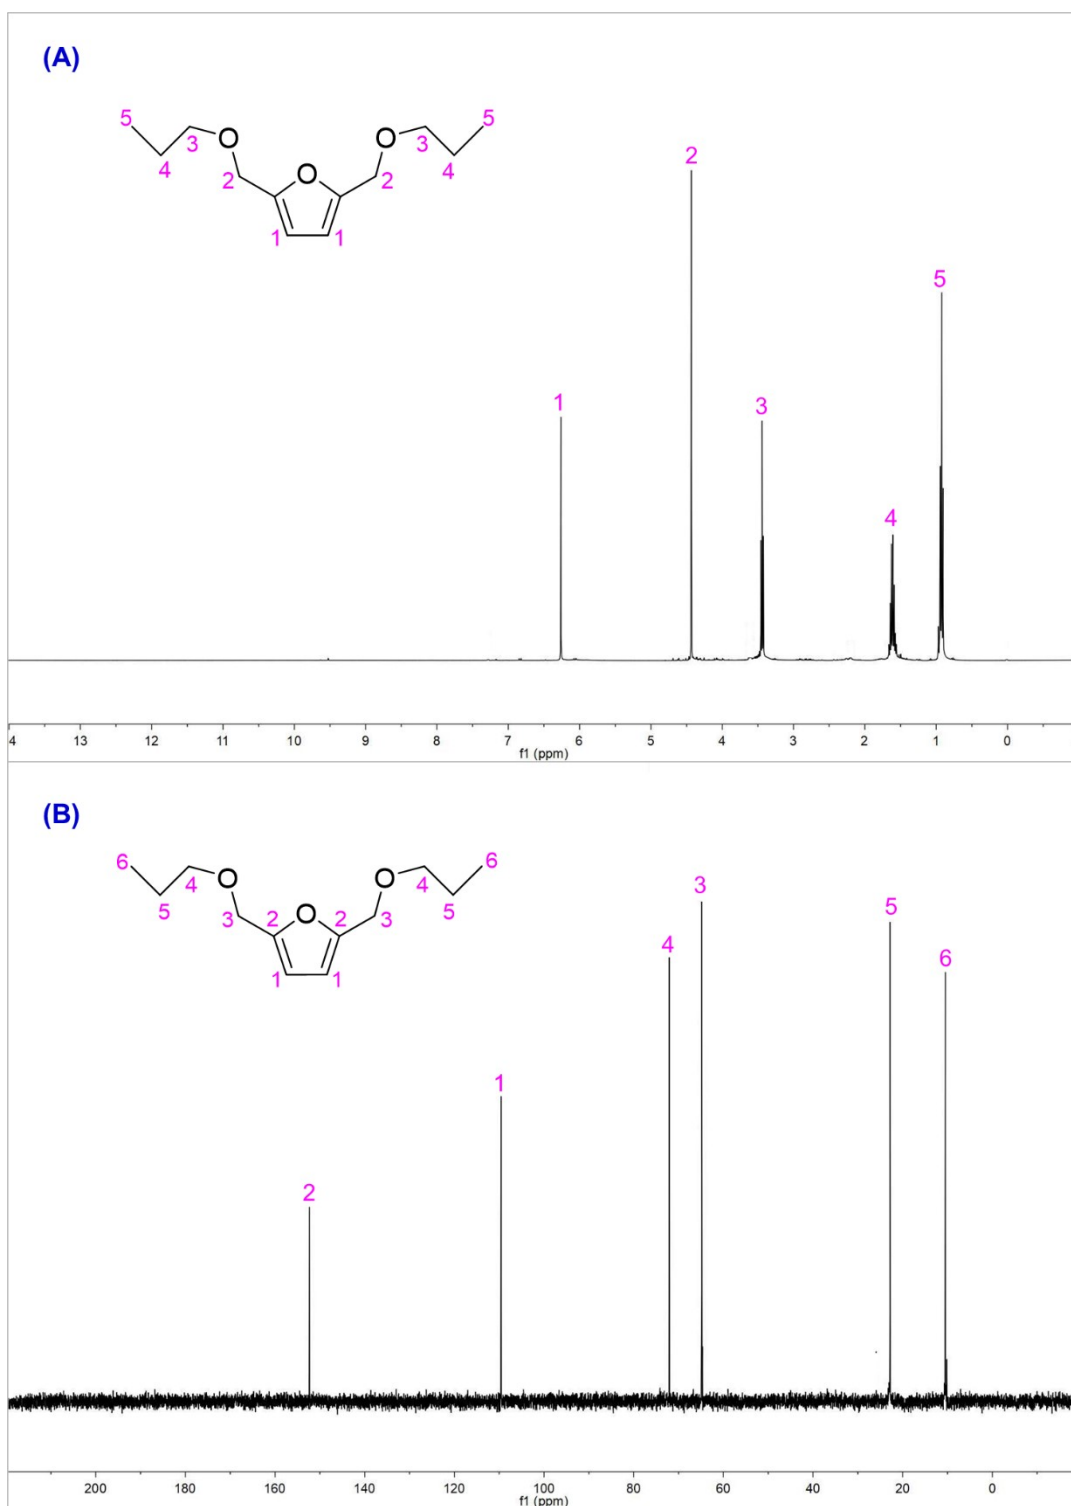

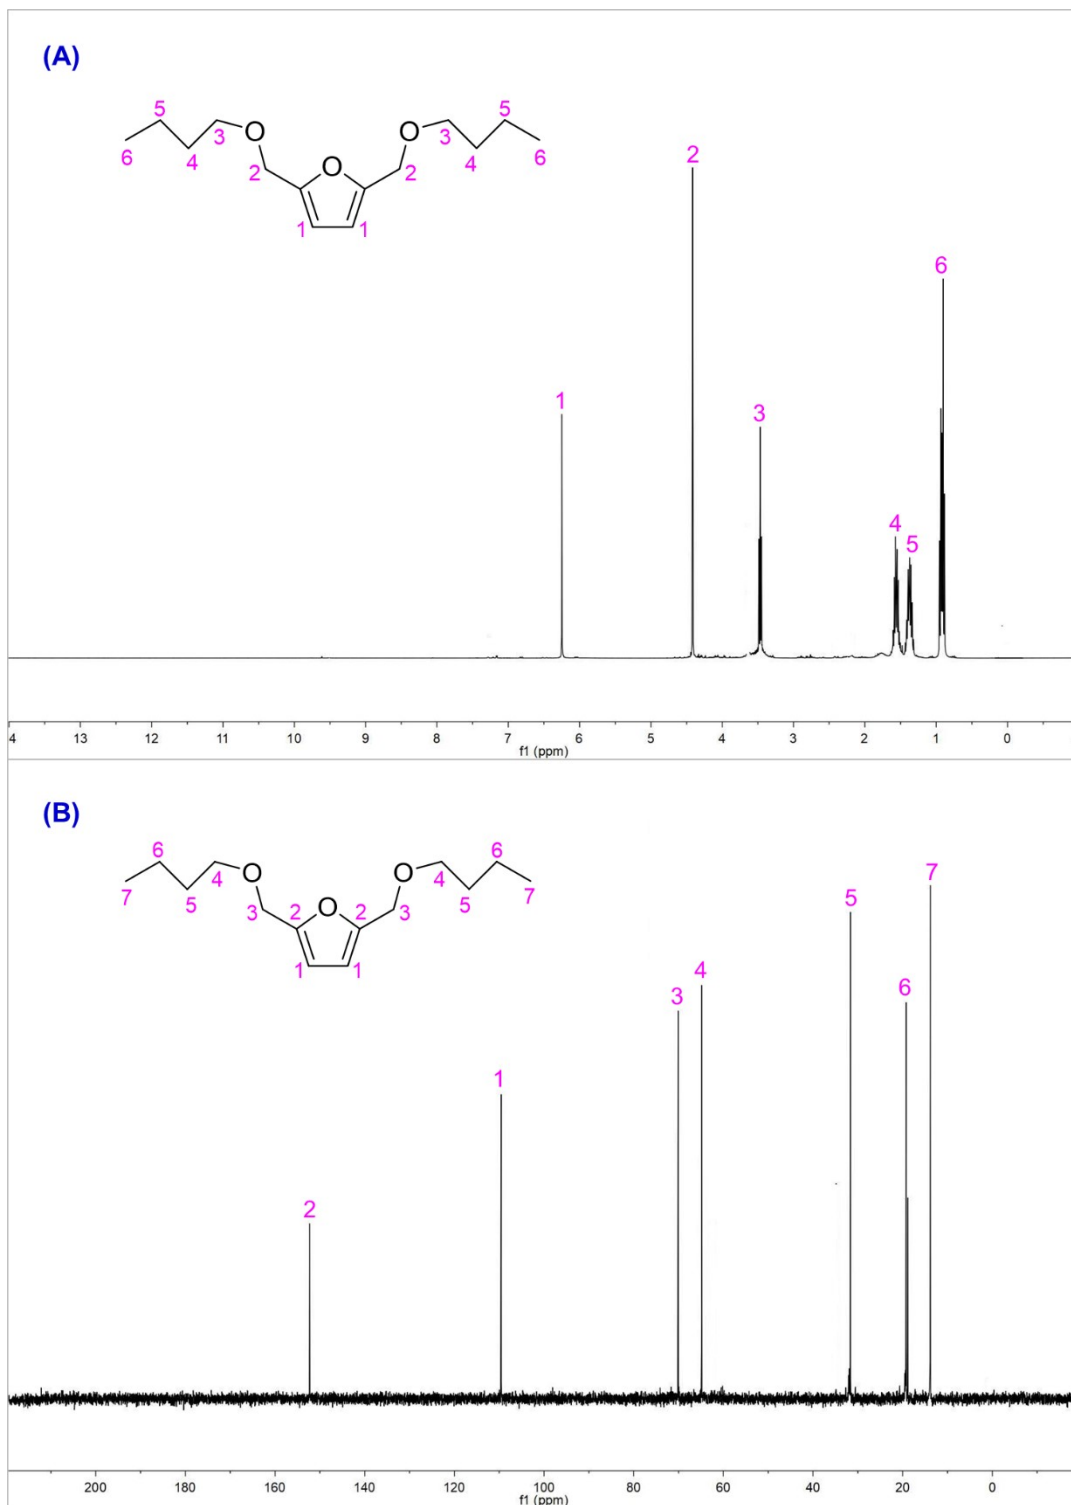

Fig. S9  $^1\text{H}$  NMR (A) and  $^{13}\text{C}$  NMR (B) of BBMF in  $\text{CDCl}_3$ .

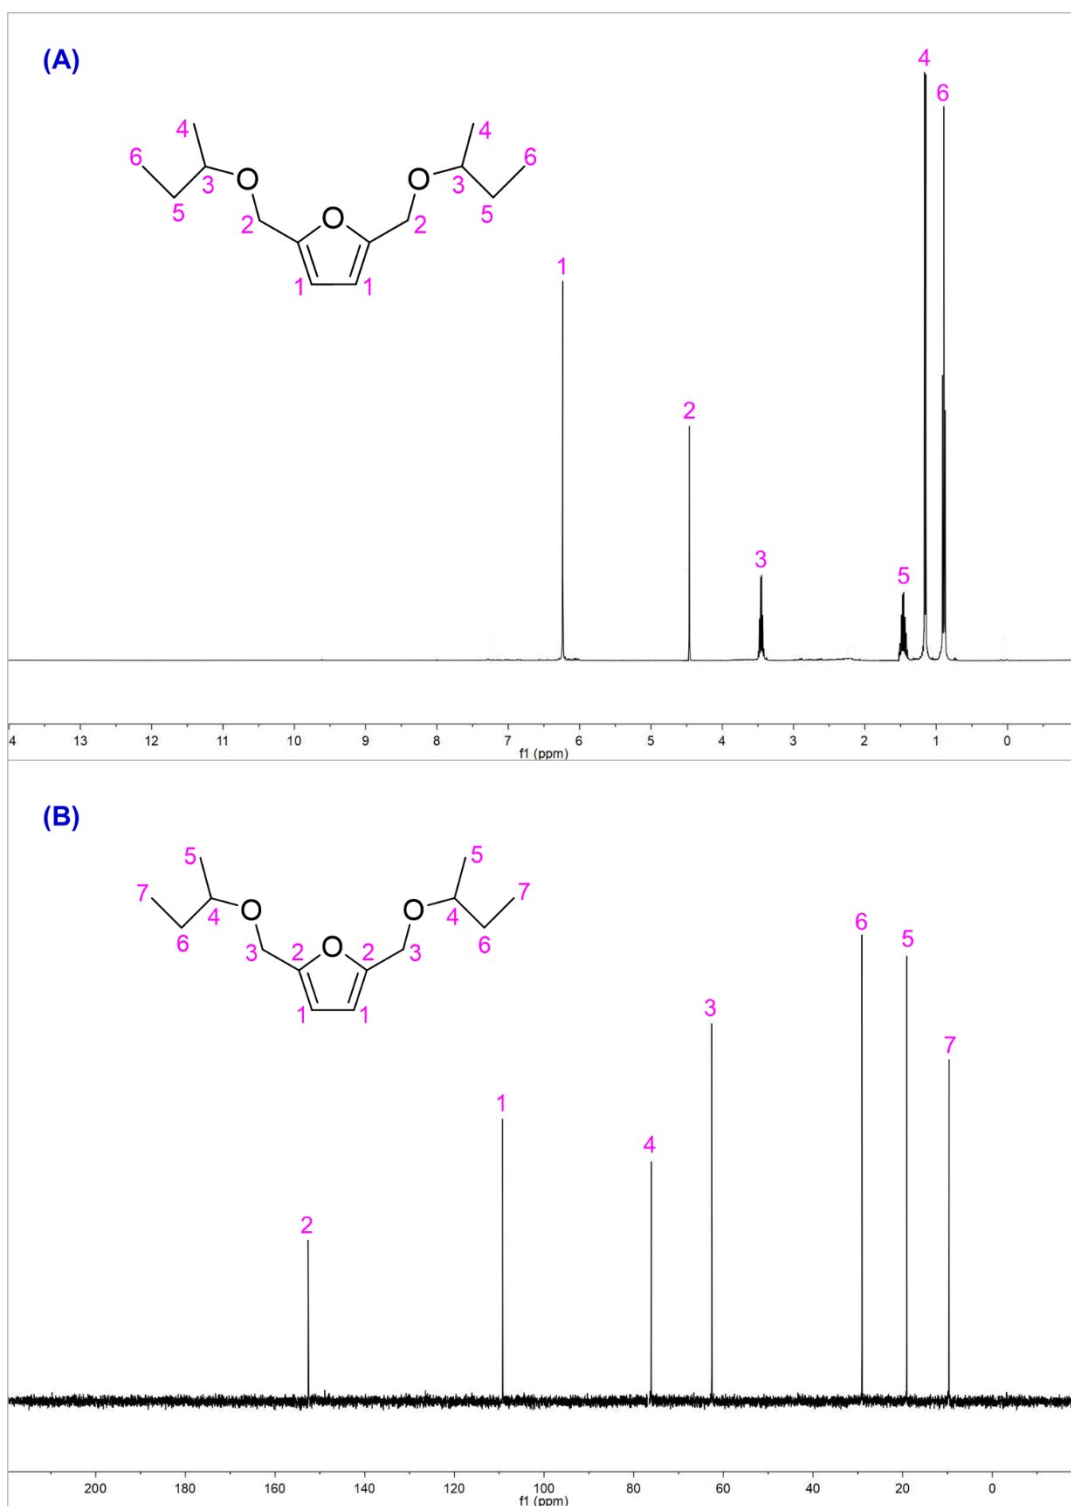

Fig. S10  $^1\text{H}$  NMR (A) and  $^{13}\text{C}$  NMR (B) of BSBMF in  $\text{CDCl}_3$ .

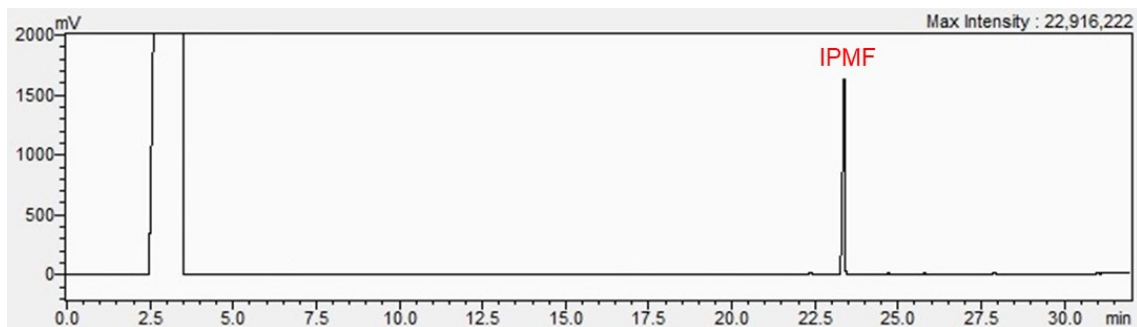

**Fig. S11** GC chromatogram for the etherification of HMF to IPMF over CT269DR.

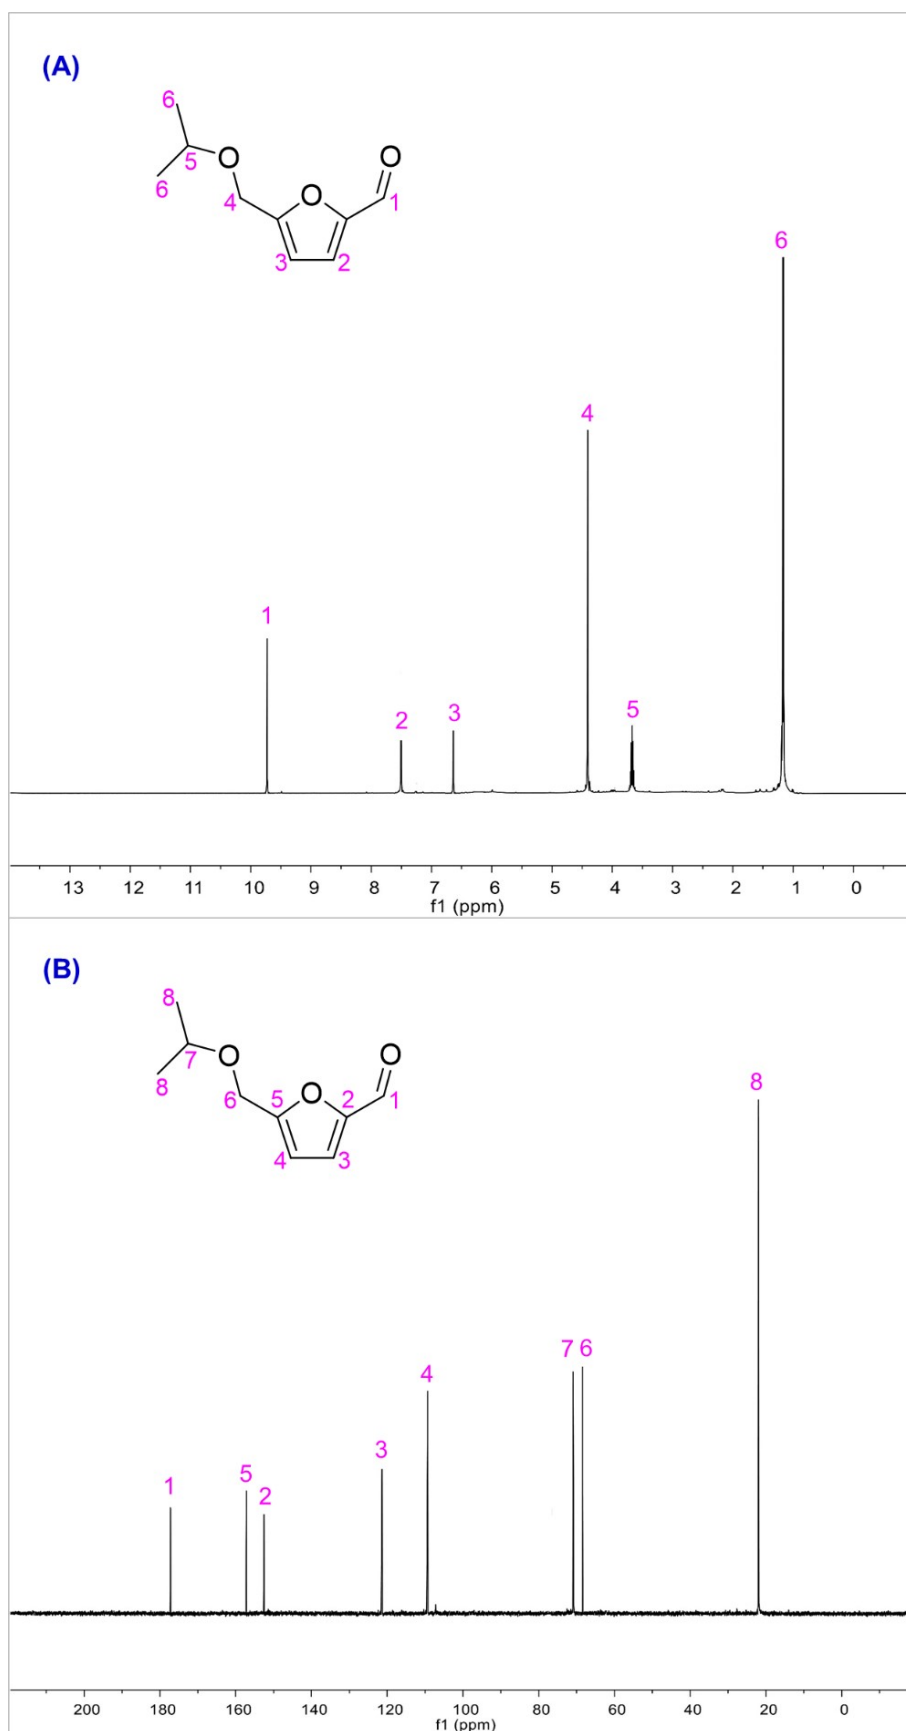

Fig. S12 <sup>1</sup>H NMR (a) and <sup>13</sup>C NMR (b) of IPMF in CDCl<sub>3</sub>.

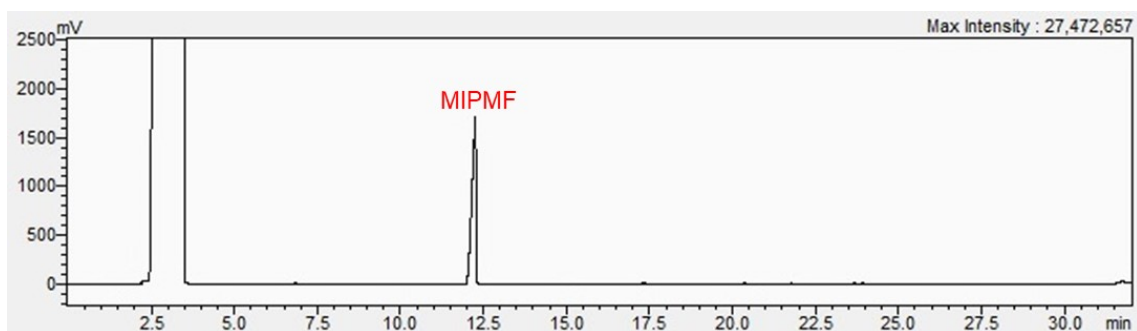

**Fig. S13** GC chromatogram for the etherification of MFA to MIPMF over CT269DR.



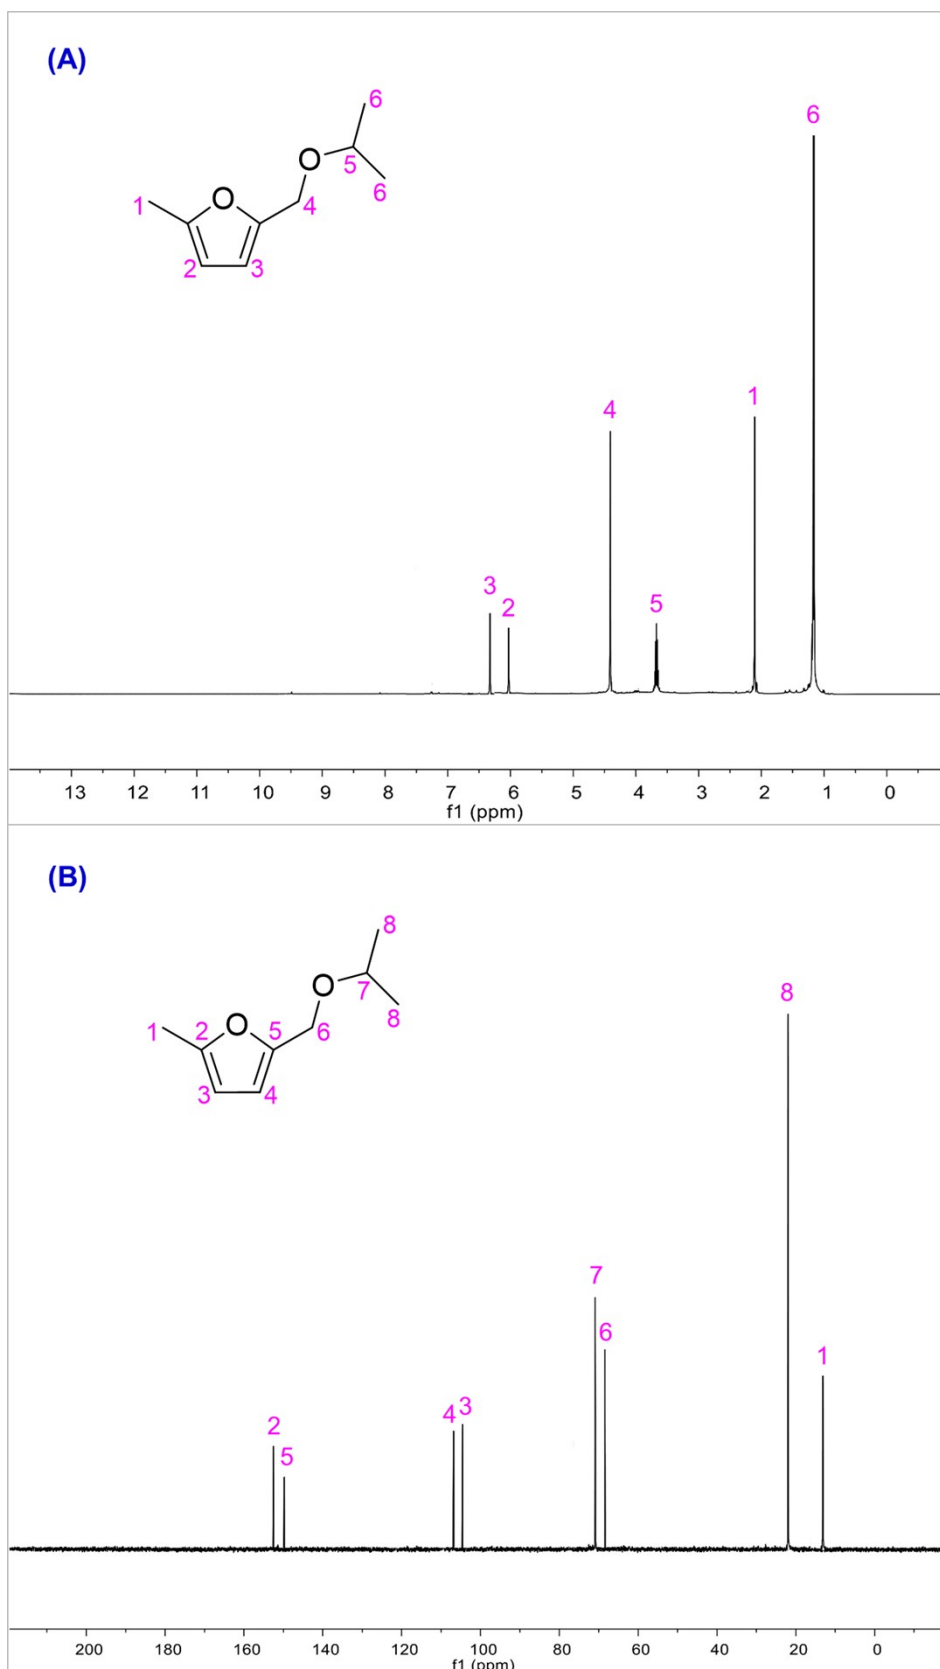

Fig. S14  $^1\text{H}$  NMR (a) and  $^{13}\text{C}$  NMR (b) of MIPMF in  $\text{CDCl}_3$ .

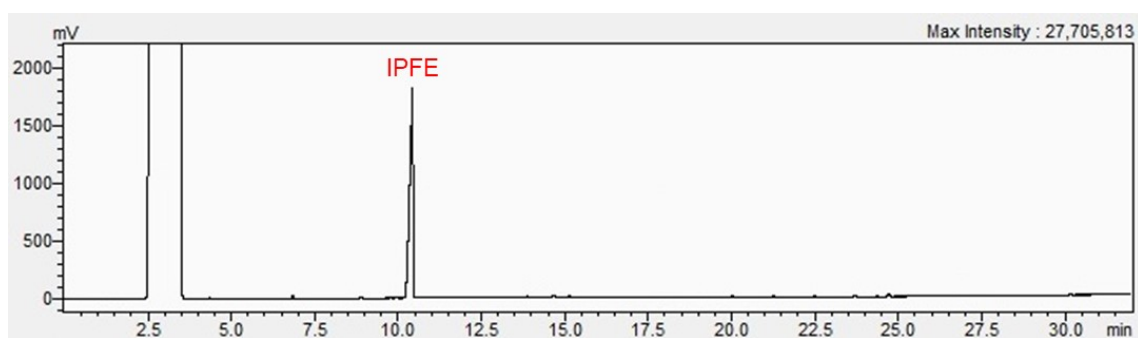

**Fig. S15** GC chromatogram for the etherification of FFA to IPFE over CT269DR.

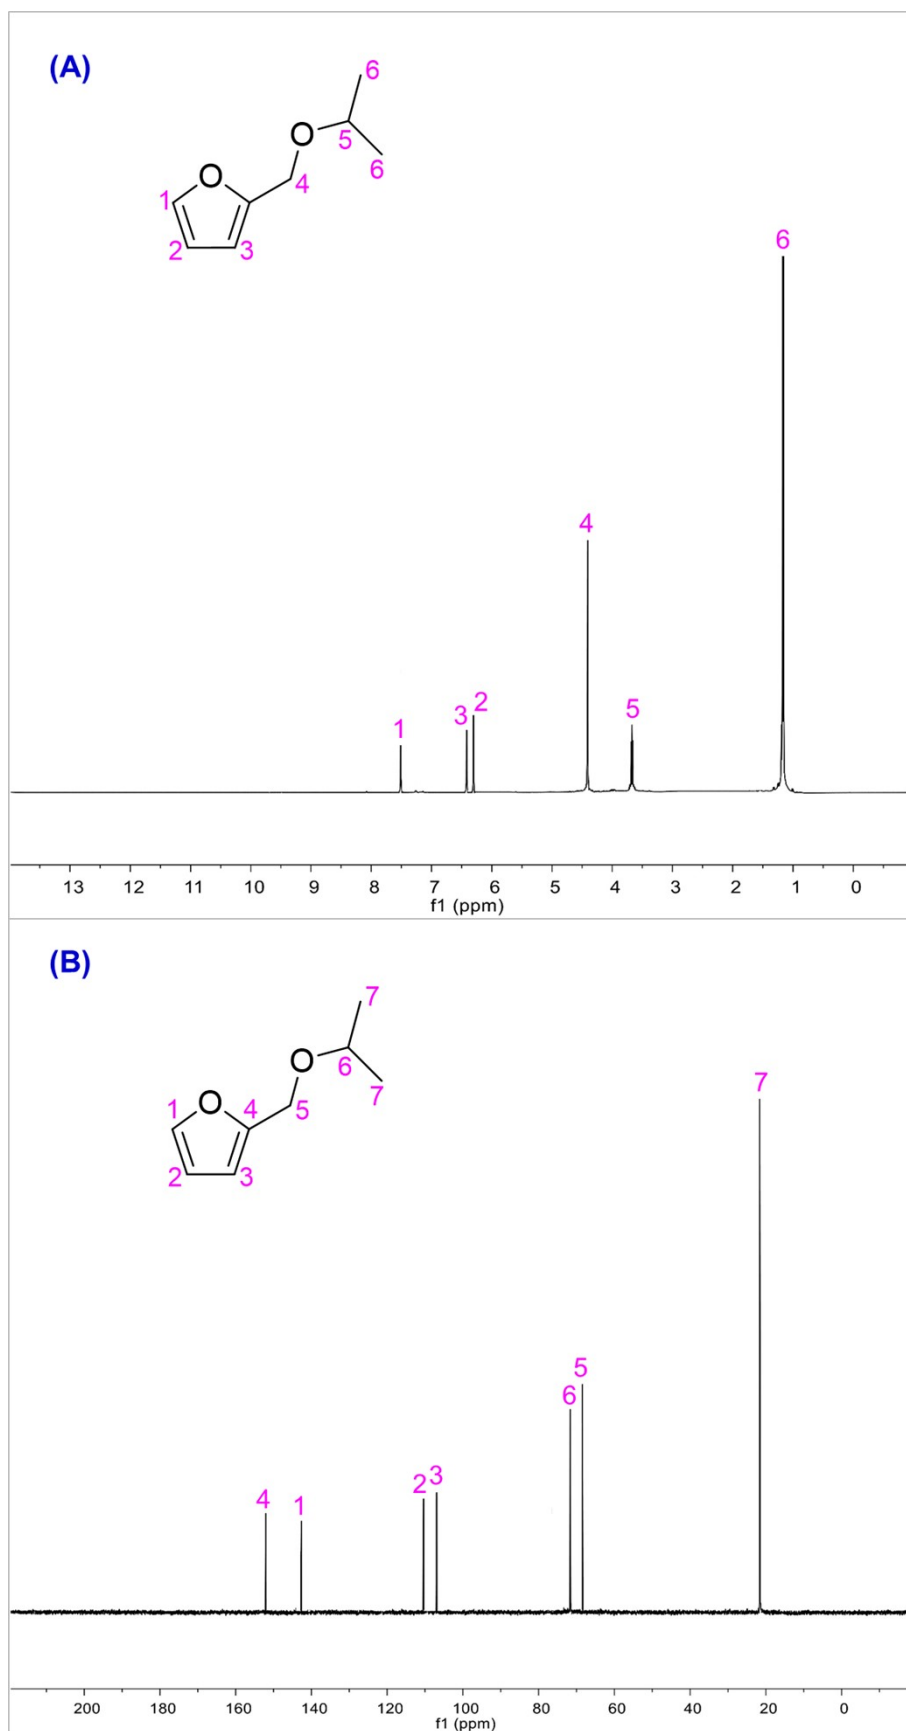

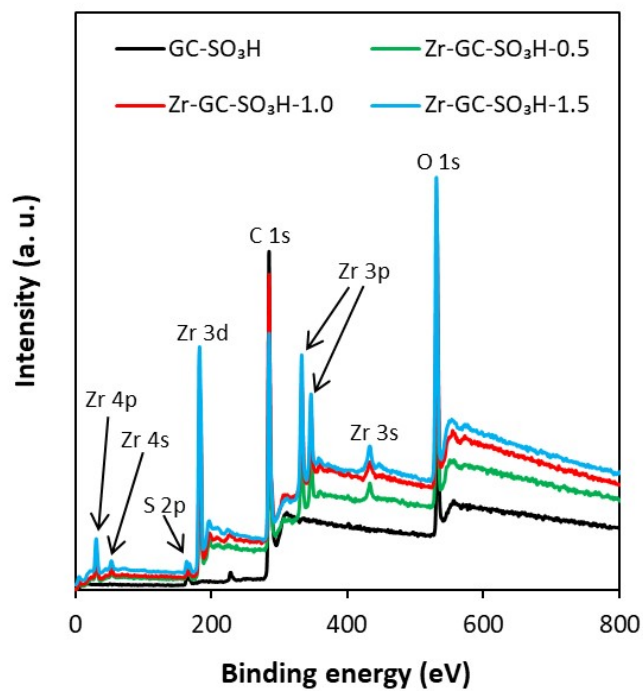

**Fig. S17** XPS survey scan spectra of GC-SO<sub>3</sub>H and Zr-GC-SO<sub>3</sub>H-X.

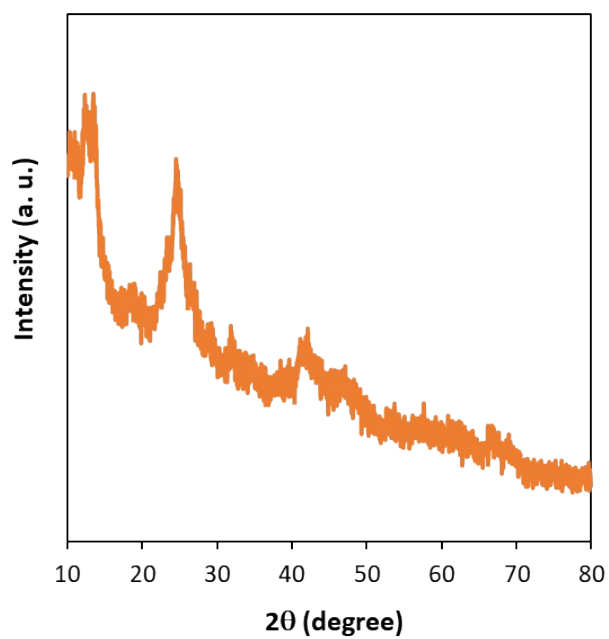

**Fig. S18** XRD pattern of ZrCl<sub>4</sub>.

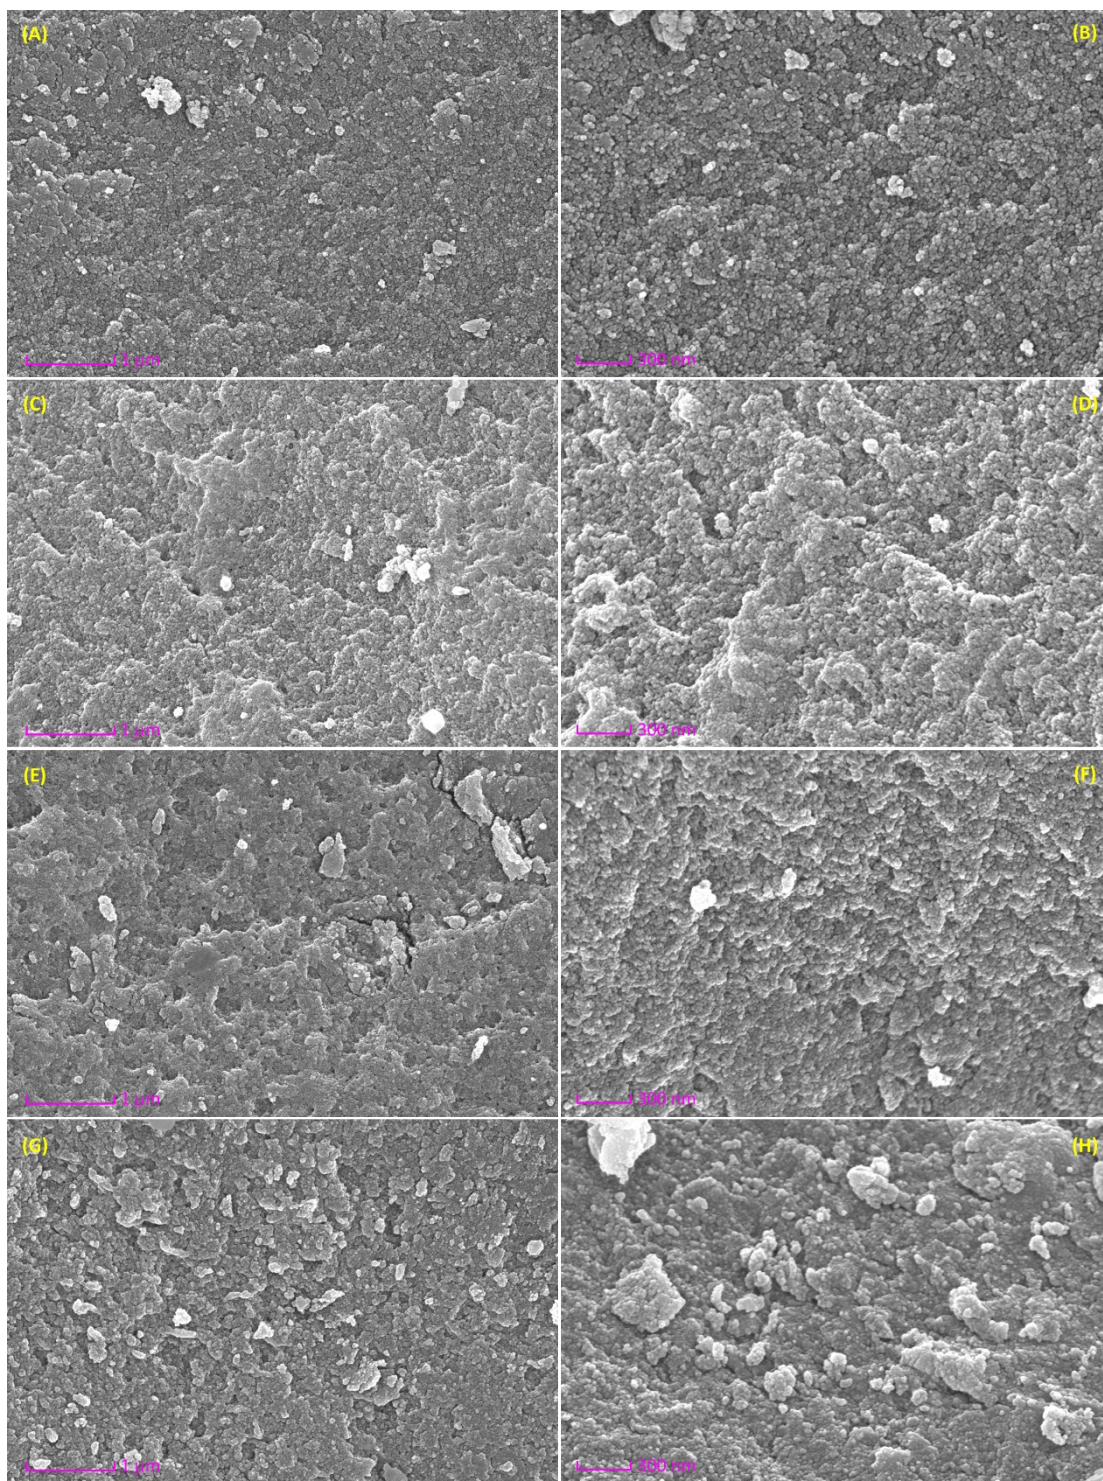

**Fig. S19** SEM images of GC-SO<sub>3</sub>H (A and B), Zr-GC-SO<sub>3</sub>H-0.5 (C and D), Zr-GC-SO<sub>3</sub>H-1.0 (E and F) and Zr-GC-SO<sub>3</sub>H-1.5 (G and H).

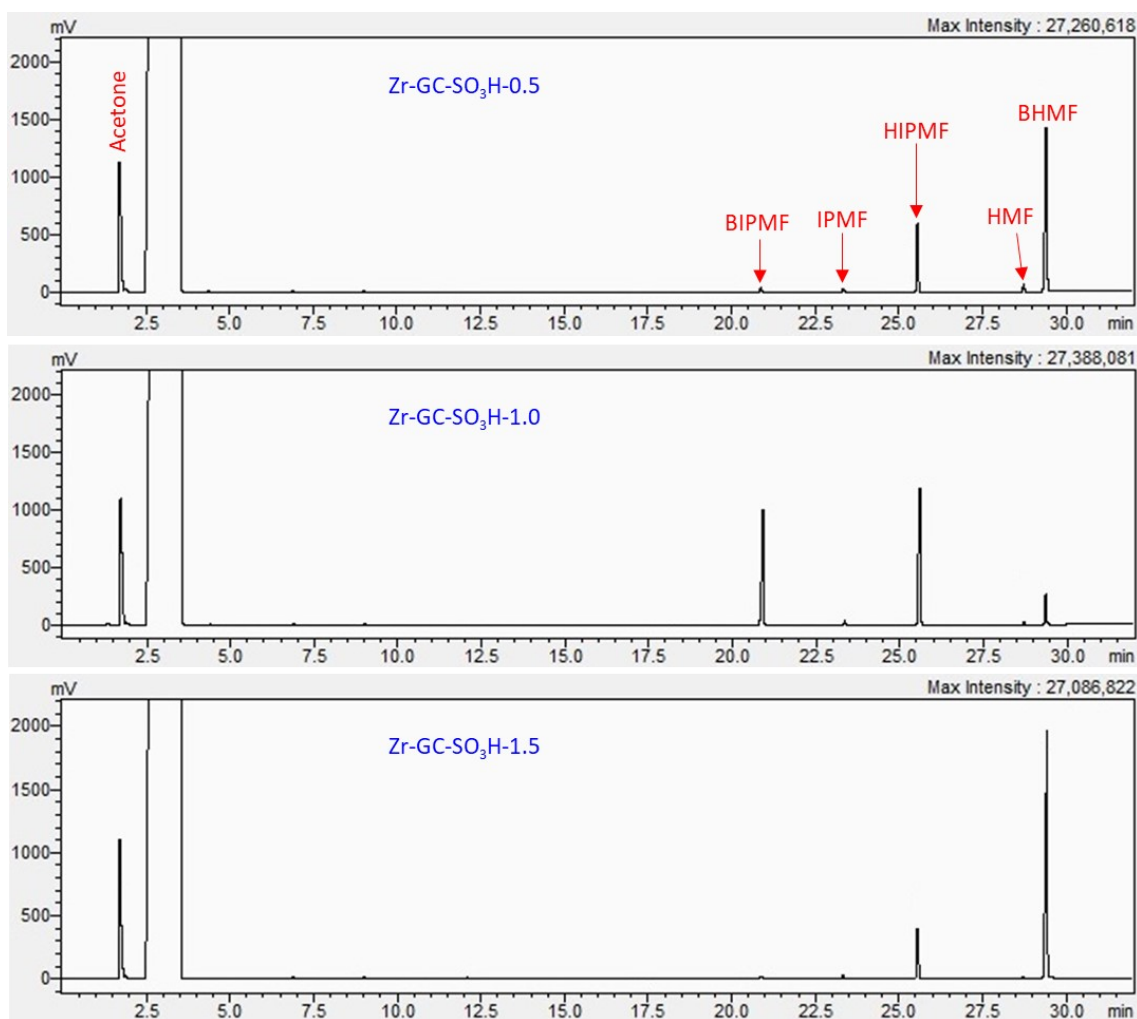

**Fig. S20** GC chromatograms for the OPRE of HMF to BIPMF over Zr-GC-SO<sub>3</sub>H-X.

Reaction conditions: 0.25 g HMF, 19.75 g iPrOH, 0.1 g Zr-GC-SO<sub>3</sub>H-X, 140 °C, 4 h.

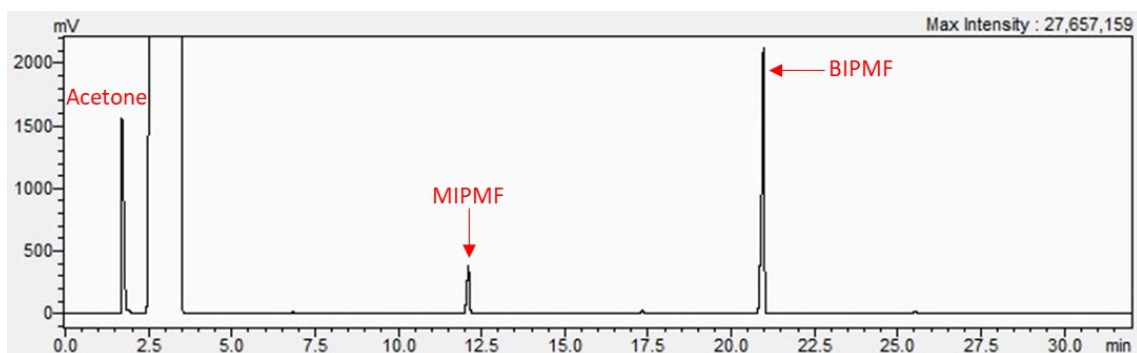

**Fig. S21** GC chromatogram for the OPRE of HMF to BIPMF over Zr-GC-SO<sub>3</sub>H-1.0.

Reaction conditions: 0.25 g HMF, 19.75 g iPrOH, 0.1 g Zr-GC-SO<sub>3</sub>H-1.0, 180 °C, 7 h.

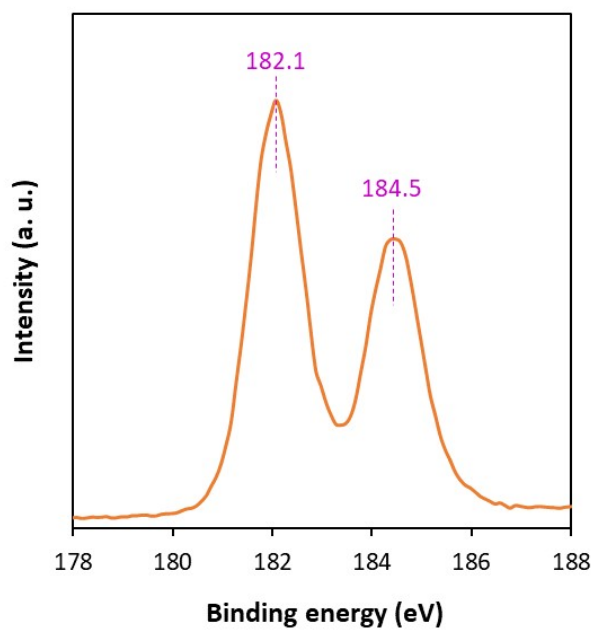

**Fig. S22** Zr 3d XPS spectrum of ZrO<sub>2</sub>.

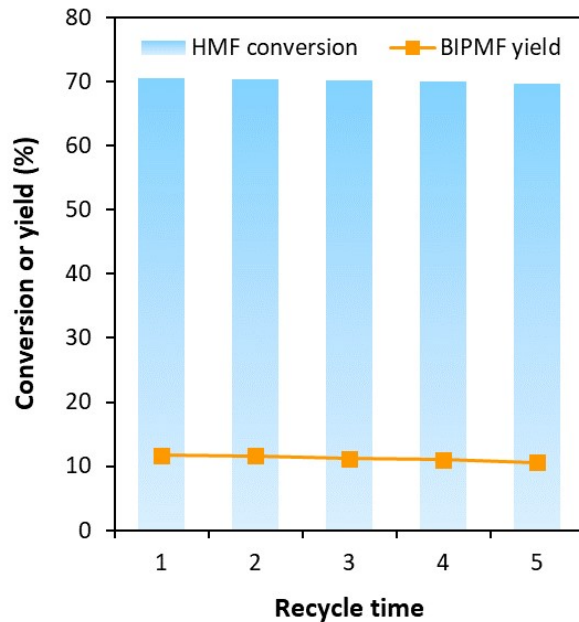

**Fig. S23** Reusability of Zr-GC-SO<sub>3</sub>H-1.0 in the OPRE of HMF to BIPMF.

Reaction conditions: 0.25 g HMF, 19.75 g iPrOH, 0.1 g Zr-GC-SO<sub>3</sub>H-1.0, 130 °C, 4 h.

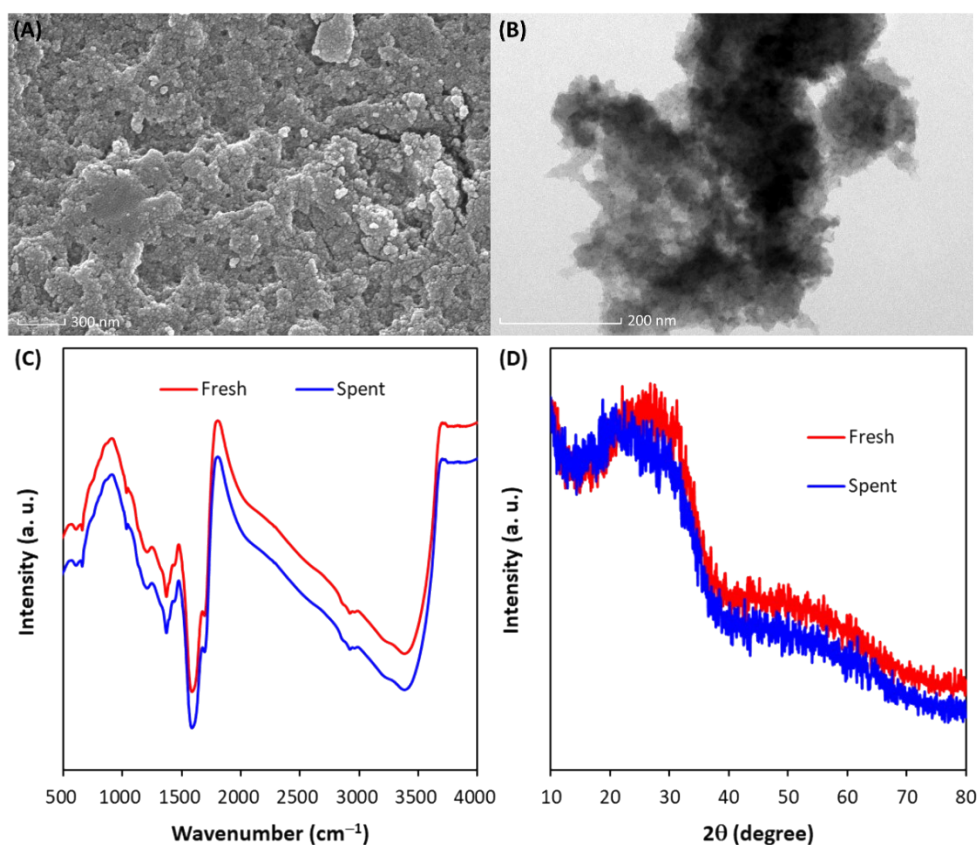

**Fig. S24** SEM images (A), TEM images (B), FT-IR spectra (C) and XRD patterns (D) of the fresh and spent Zr-GC-SO<sub>3</sub>H-1.0.

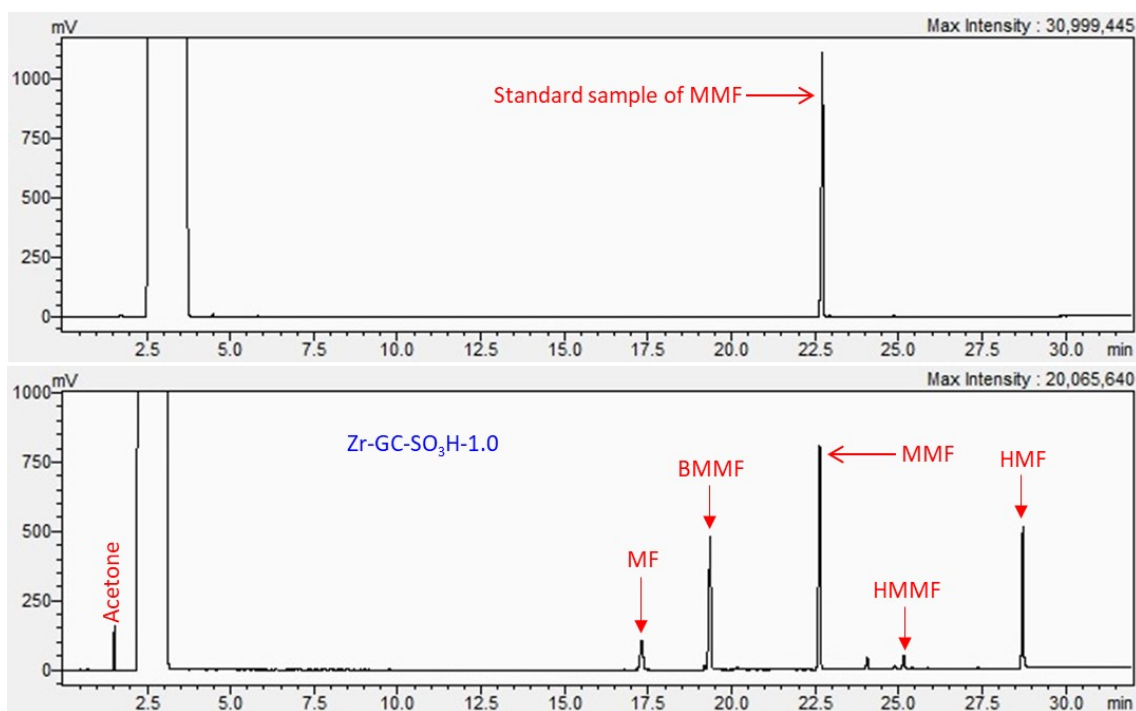

**Fig. S25** GC chromatograms for the OPRE of HMF in MeOH over Zr-GC-SO<sub>3</sub>H-1.0. Reaction conditions: 0.25 g HMF, 19.75 g MeOH, 0.1 g Zr-GC-SO<sub>3</sub>H-1.0, 180 °C, 6 h.



**Table S1** Physicochemical properties of various catalysts

| Catalyst                                 | Surface area<br>(m <sup>2</sup> /g) <sup>a</sup> | Pore volume<br>(cm <sup>3</sup> /g) <sup>b</sup> | Pore size<br>(nm) <sup>b</sup> | Acid content<br>(mmol/g) <sup>c</sup> | Base content<br>(mmol/g) <sup>d</sup> | L/B ratio <sup>e</sup> |
|------------------------------------------|--------------------------------------------------|--------------------------------------------------|--------------------------------|---------------------------------------|---------------------------------------|------------------------|
| ZrO <sub>2</sub>                         | 26.5                                             | 0.062                                            | 9.2                            | 0.08                                  | 0.11                                  | —                      |
| TsOH                                     | —                                                | —                                                | —                              | —                                     | —                                     | —                      |
| GHTC                                     | 57.12                                            | 0.058                                            | 5.44                           | 1.78                                  | 0.28                                  | —                      |
| GC-SO <sub>3</sub> H                     | 260.23                                           | 0.115                                            | 3.37                           | 2.27                                  | 0.49                                  | —                      |
| Zr-GHTC                                  | 313.54                                           | 0.149                                            | 4.78                           | 1.19                                  | 1.72                                  | 40.62                  |
| Zr-GC-SO <sub>3</sub> H-0.5              | 235.46                                           | 0.107                                            | 3.11                           | 1.84                                  | 0.96                                  | 5.37                   |
| Zr-GC-SO <sub>3</sub> H-1.0              | 199.32                                           | 0.088                                            | 2.81                           | 2.08                                  | 1.39                                  | 7.12                   |
| Zr-GC-SO <sub>3</sub> H-1.5              | 135.86                                           | 0.052                                            | 2.62                           | 2.34                                  | 1.67                                  | 8.81                   |
| Zr-GC-SO <sub>3</sub> H-1.0 <sup>f</sup> | 190.65                                           | 0.081                                            | 2.67                           | 1.96                                  | 1.28                                  | 7.01                   |

<sup>a</sup> Surface areas were obtained by the method of BET. <sup>b</sup> Pore volumes and pore sizes were estimated by the method of BJH. <sup>c</sup> Acid contents were determined by the profiles of NH<sub>3</sub>-TPD. <sup>d</sup> Base contents were determined by the profiles of CO<sub>2</sub>-TPD. <sup>e</sup> L/B ratios were measured by the profiles of pyridine-adsorbed FT-IR at 110 °C. <sup>f</sup> The catalyst was reused for five reaction cycles.

**Table S2** OPRE of HMF to BIPMF over Zr-GC-SO<sub>3</sub>H-1.0 at the lower reaction temperatures

| Entry | Temperature (°C) | Conversion (%) | Yield (%) |      |       |       |
|-------|------------------|----------------|-----------|------|-------|-------|
|       |                  |                | BHMF      | IPMF | HIPMF | BIPMF |
| 1     | 80               | 19.1           | 6.8       | 0.0  | 5.6   | 0.0   |
| 2     | 90               | 25.7           | 10.4      | 0.0  | 9.9   | 0.0   |
| 3     | 100              | 34.8           | 12.9      | 0.0  | 16.7  | 0.0   |
| 4     | 120              | 57.6           | 14.1      | 2.1  | 20.2  | 7.9   |

Reaction conditions: 0.25 g HMF, 19.75 g iPrOH, 0.1 g Zr-GC-SO<sub>3</sub>H-1.0, 4 h.

**Table S3** EA and ICP-AES of the fresh and spent Zr-GC-SO<sub>3</sub>H-1.0

| Catalyst | Element content (%) |                |                |                 |
|----------|---------------------|----------------|----------------|-----------------|
|          | C <sup>a</sup>      | S <sup>a</sup> | H <sup>a</sup> | Zr <sup>b</sup> |
| Fresh    | 59.85               | 2.05           | 2.38           | 5.97            |
| Spent    | 64.78               | 1.96           | 2.41           | 5.82            |

<sup>a</sup> C, S and H were measured by EA. <sup>b</sup> Zr was measured by ICP-AES.
